# Supplementary material
Source: PubMed Central journal article supplement (PMC7472512)

Targeted metabolomics identifies pharmacodynamic biomarkers for BIO 300 mitigation of radiation-induced lung injury

Jace W. Jones<sup>1</sup>, Isabel L. Jackson<sup>2</sup>, Zeljko Vujaskovic<sup>2</sup>, Michael D. Kaytor<sup>3</sup>, Maureen A. Kane<sup>1\*</sup>

<sup>1</sup>University of Maryland, School of Pharmacy, Department of Pharmaceutical Sciences, Baltimore, MD;

<sup>2</sup> University of Maryland, School of Medicine, Division of Translational Radiation Sciences, Department of Radiation Oncology, Baltimore, MD;

<sup>3</sup>Humanetics Corporation., Edina, MN;

\*Maureen A. Kane

University of Maryland, School of Pharmacy

Department of Pharmaceutical Sciences

20 N. Pine Street, Room 723

Baltimore, MD 21201

Phone: (410) 706-5097

Fax: (410) 706-0886

Email: [mkane@rx.umaryland.edu](mailto:mkane@rx.umaryland.edu)

## Supporting Information

**Table S1.** List of p180 analytes, ratios and sums.

**Table S2.** List of significant metabolites comparing 0 w/2 w to 6 w/sham. Significance was calculated by t-test using a FDR of < 5%. The mean values are reported in pmol/mg of tissue. SD=standard deviation, SEM=standard error of the mean, N=number of individual samples

**Table S3.** List of significant metabolites comparing 6 w to sham. Significance was calculated by t-test using a FDR of < 5%. The mean values are reported in pmol/mg of tissue. SD=standard deviation, SEM=standard error of the mean, N=number of individual samples

**Figure S1.** Histopathologic damage among BIO 300 treated and untreated male C57L/J mice surviving to day 180 post 12.5 Gy WTLI. Paraffin embedded left lung samples were sectioned at 5 micron thickness and stained with Masson's Trichrome. The lungs of sham-irradiated animals, age matched to the irradiated animals, display normal alveolar architecture with evidence of focal bronchial epithelial hyperplasia in some instances at 180 days. (a). Diffuse inflammation can be observed throughout the untreated, irradiated lung (b) with airway consolidation particularly around the subpleura. High magnification (10x) of the damaged area demonstrates alveolitis with collagen deposition and airway collapse (b.1). Inflammation is characterized by an abundance of foamy macrophages and mononuclear cell lymphocytes (b.2). Bronchial epithelial hyperplasia is also observed (b.2). Parts of the lung were less damaged (b.3) but contained inflammatory cells and displayed interstitial edema with mild to moderately increased alveolar wall thickness. The lungs of male C57L/J mice treated with 2 or 6 weeks of BIO 300 starting 24 hours post exposure

to 12.5 Gy WTLI displayed less damage than the untreated controls. However, 2 weeks of administration was inferior to 6 weeks (c, d). Airway congestion with proteinaceous exudate and mononuclear cell, foamy macrophages, and bronchial epithelial hyperplasia (c.1) along with interstitial inflammation (c.2.) and airway consolidation with fibrous deposition (c.3) were observed in the lungs of animals treated for 2 weeks post-exposure, similar to that of the untreated controls. In contrast, the lungs from surviving animals treated with BIO 300 for 6 weeks displayed less overall damage (D) with focal areas of injury (d.1), but with large volumes of normal, well aerated lung (d.2, d.3). Panels of local damage were taken at 10x magnification.

**Figure S2.** Multivariate analysis of the four individual cohorts: 0 w, 2 w, 6 w, and sham. A.) PCA plot comparing 0 w (red), 2 w (green), 6 w (purple), and sham (blue). The 95% confidence interval is indicated by the elliptical pattern per group. B.) PLS-DA plot comparing 0 w (red), 2 w (green), 6 w (purple), and sham (blue). The 95% confidence interval is indicated by the elliptical pattern per group. Analysis was performed using MetaboAnalyst 3.0.

**Figure S3.** Correlation analysis using a dendrogram to compare 0 w (red), 2 w (green), 6 w (purple), and sham (blue). The dendrogram correlation analysis was done using Pearson distance measurement and Ward clustering via MetaboAnalyst 3.0.

**Table S1.**

|    | <b>p180<br/>Abbreviation</b> | <b>Common Name</b>                      | <b>IUPAC Name</b>                                                                    | <b>Metabolite<br/>Class</b> | <b>HMDB ID</b> |
|----|------------------------------|-----------------------------------------|--------------------------------------------------------------------------------------|-----------------------------|----------------|
| 1  | C0                           | L-Carnitine                             | (3R)-3-hydroxy-4-(trimethylazaniumyl)butanoate                                       | Acylcarnitine               | HMDB00062      |
| 2  | C2                           | L-Acetylcarnitine                       | 3-(acetyloxy)-4-(trimethylazaniumyl)butanoate                                        | Acylcarnitine               | HMDB00201      |
| 3  | C3                           | Propionylcarnitine                      | 3-(propanoyloxy)-4-(trimethylazaniumyl)butanoate                                     | Acylcarnitine               | HMDB00824      |
| 4  | C3:1                         | Propenoylcarnitine                      | (3S)-3-(prop-2-enoyloxy)-4-(trimethylazaniumyl)butanoate                             | Acylcarnitine               | HMDB13124      |
| 5  | C3-OH                        | Hydroxypropionylcarnitine               | (3S)-3-[(3-hydroxypropanoyl)oxy]-4-(trimethylazaniumyl)butanoate                     | Acylcarnitine               | HMDB13125      |
| 6  | C4                           | Butyrylcarnitine                        | 3-(butanoyloxy)-4-(trimethylazaniumyl)butanoate                                      | Acylcarnitine               | HMDB02013      |
| 7  | C4:1                         | Butenylcarnitine                        | (3S)-3-[(2E)-but-2-enoyloxy]-4-(trimethylazaniumyl)butanoate                         | Acylcarnitine               | HMDB13126      |
| 8  | C3-DC (C4-OH)                | Hydroxybutyrylcarnitine                 | (3S)-3-[(3-hydroxybutanoyl)oxy]-4-(trimethylazaniumyl)butanoate                      | Acylcarnitine               | HMDB13127      |
| 9  | C5                           | Valerylcarnitine                        | (3S)-3-(pentanoyloxy)-4-(trimethylazaniumyl)butanoate                                | Acylcarnitine               | HMDB13128      |
| 10 | C5:1                         | Tiglylcarnitine                         | 3-{[(2E)-2-methylbut-2-enoyl]oxy}-4-(trimethylazaniumyl)butanoate                    | Acylcarnitine               | HMDB02366      |
| 11 | C5:1-DC                      | Glutaconylcarnitine                     | (3S)-3-{[(2E)-4-carboxybut-2-enoyl]oxy}-4-(trimethylazaniumyl)butanoate              | Acylcarnitine               | HMDB13129      |
| 12 | C5-DC (C6-OH)                | Glutaryl carnitine                      | (3S)-3-[(4-carboxybutanoyl)oxy]-4-(trimethylazaniumyl)butanoate                      | Acylcarnitine               | HMDB13130      |
| 13 | C5-M-DC                      | 3-Methylglutaryl carnitine              | 5-[[1-carboxy-3-(trimethylazaniumyl)propan-2-yl]oxy]-3-methyl-5-oxopentanoate        | Acylcarnitine               | HMDB00552      |
| 14 | C5-OH (C3-DC-M)              | Hydroxyvalerylcarnitine                 | (3S)-3-[(1,3-dihydroxypentyl)oxy]-4-(trimethylazaniumyl)butanoate                    | Acylcarnitine               | HMDB13132      |
| 15 | C6:1                         | 2-Hexenoylcarnitine                     | 3-[(2E)-hex-2-enoyloxy]-4-(trimethylazaniumyl)butanoate                              | Acylcarnitine               | HMDB13161      |
| 16 | C6 (C4:1-DC)                 | Hexanoylcarnitine                       | 3-(hexanoyloxy)-4-(trimethylazaniumyl)butanoate                                      | Acylcarnitine               | HMDB00705      |
| 17 | C7-DC                        | Pimelylcarnitine                        | (4S)-4-[(6-carboxyhexanoyl)oxy]-4-(trimethylazaniumyl)butanoate                      | Acylcarnitine               | HMDB13328      |
| 18 | C8                           | L-Octanoylcarnitine                     | (3R)-3-(octanoyloxy)-4-(trimethylazaniumyl)butanoate                                 | Acylcarnitine               | HMDB00791      |
| 19 | C9                           | Nonanoylcarnitine                       | 3-(nonanoyloxy)-4-(trimethylazaniumyl)butanoate                                      | Acylcarnitine               | HMDB13288      |
| 20 | C10                          | Decanoylcarnitine                       | 3-(decanoyloxy)-4-(trimethylazaniumyl)butanoate                                      | Acylcarnitine               | HMDB00651      |
| 21 | C10:1                        | 9-Decenoylcarnitine                     | 3-(dec-9-enoyloxy)-4-(trimethylazaniumyl)butanoate                                   | Acylcarnitine               | HMDB13205      |
| 22 | C10:2                        | linoleoylcarnitine                      | (3R)-3-[(9Z,12Z)-octadeca-9,12-dienoyloxy]-4-(trimethylazaniumyl)butanoate           | Acylcarnitine               | HMDB06469      |
| 23 | C12                          | Dodecanoylcarnitine                     | (3R)-3-(dodecanoyloxy)-4-(trimethylazaniumyl)butanoate                               | Acylcarnitine               | HMDB02250      |
| 24 | C12:1                        | trans-2-Dodecenoylcarnitine             | (4S)-4-(dodec-2-enoyloxy)-4-(trimethylazaniumyl)butanoate                            | Acylcarnitine               | HMDB13326      |
| 25 | C12-DC                       | Dodecanedioylcarnitine                  | (4S)-4-[(11-carboxyundecanoyl)oxy]-4-(trimethylazaniumyl)butanoate                   | Acylcarnitine               | HMDB13327      |
| 26 | C14                          | Tetradecanoylcarnitine                  | (3R)-3-(tetradecanoyloxy)-4-(trimethylazaniumyl)butanoate                            | Acylcarnitine               | HMDB05066      |
| 27 | C14:1                        | cis-5-Tetradecenoylcarnitine            | 3-[(5Z)-tetradec-5-enoyloxy]-4-(trimethylazaniumyl)butanoate                         | Acylcarnitine               | HMDB02014      |
| 28 | C14:1-OH                     | 3-Hydroxy-cis-5-tetradecenoylcarnitine  | (4S)-4-{[(5Z)-3-hydroxytetradec-5-enoyl]oxy}-4-(trimethylazaniumyl)butanoate         | Acylcarnitine               | HMDB13330      |
| 29 | C14:2                        | 3, 5-Tetradecadienylcarnitine           | (4S)-4-[(3E,5E)-tetradeca-3,5-dienoyloxy]-4-(trimethylazaniumyl)butanoate            | Acylcarnitine               | HMDB13331      |
| 30 | C14:2-OH                     | 3-Hydroxy-5, 8-tetradecadienylcarnitine | (4S)-4-{[(5E,7E)-3-hydroxytetradeca-5,7-dienoyl]oxy}-4-(trimethylazaniumyl)butanoate | Acylcarnitine               | HMDB13332      |
| 31 | C16                          | 9-Hexadecenoylcarnitine                 | (4S)-4-[(9Z)-hexadec-9-enoyloxy]-4-(trimethylazaniumyl)butanoate                     | Acylcarnitine               | HMDB13207      |

|    |           |                                     |                                                                                      |                |           |
|----|-----------|-------------------------------------|--------------------------------------------------------------------------------------|----------------|-----------|
| 32 | C16:1     | 9-Hexadecenoylcarnitine             | (4S)-4-[(9Z)-hexadec-9-enoyloxy]-4-(trimethylazaniumyl)butanoate                     | Acylcarnitine  | HMDB13207 |
| 33 | C16-OH    | 2-Hydroxyhexadecanoylcarnitine      | (4S)-4-[(2-hydroxyhexadecanoyl)oxy]-4-(trimethylazaniumyl)butanoate                  | Acylcarnitine  | HMDB13337 |
| 34 | C16:1-OH  | 3-Hydroxy-9-hexadecenoylcarnitine   | (4S)-4-[[9Z]-3-hydroxyhexadec-9-enoyl]oxy]-4-(trimethylazaniumyl)butanoate           | Acylcarnitine  | HMDB13333 |
| 35 | C16:2     | 9,12-Hexadecadienoylcarnitine       | (4S)-4-[(9Z,12Z)-hexadeca-9,12-dienoyloxy]-4-(trimethylazaniumyl)butanoate           | Acylcarnitine  | HMDB13334 |
| 36 | C16:2-OH  | 3-Hydroxyhexadecadienoylcarnitine   | (4S)-4-[(9Z,12Z)-3-hydroxyhexadeca-9,12-dienoyl]oxy]-4-(trimethylazaniumyl)butanoate | Acylcarnitine  | HMDB13335 |
| 37 | C18       | Stearoylcarnitine                   | 3-(octadecanoyloxy)-4-(trimethylazaniumyl)butanoate                                  | Acylcarnitine  | HMDB00848 |
| 38 | C18:1     | 11Z-Octadecenylcarnitine            | (4S)-4-[(11Z)-octadec-11-enoyloxy]-4-(trimethylazaniumyl)butanoate                   | Acylcarnitine  | HMDB13338 |
| 39 | C18:1-OH  | 3-Hydroxy-11Z-octadecenoylcarnitine | (4S)-4-[[11Z)-3-hydroxyoctadec-11-enoyl]oxy]-4-(trimethylazaniumyl)butanoate         | Acylcarnitine  | HMDB13339 |
| 40 | C18:2     | Linoleyl carnitine                  | (3R)-3-[(9Z,12Z)-octadeca-9,12-dienoyloxy]-4-(trimethylazaniumyl)butanoate           | Acylcarnitine  | HMDB06469 |
| 41 | Ala       | Alanine                             | 2-aminopropanoic acid                                                                | Amino Acid     | HMDB00161 |
| 42 | Arg       | Arginine                            | 2-amino-5-carbamimidamidopentanoic acid                                              | Amino Acid     | HMDB00517 |
| 43 | Asn       | Asparagine                          | 2-amino-3-carbamoylpropanoic acid                                                    | Amino Acid     | HMDB00168 |
| 44 | Asp       | Aspartate                           | 2-aminobutanedioic acid                                                              | Amino Acid     | HMDB00191 |
| 45 | Cit       | Citrulline                          | 2-amino-5-(carbamoylamino)pentanoic acid                                             | Amino Acid     | HMDB00904 |
| 46 | Gln       | Glutamine                           | 2-amino-4-carbamoylbutanoic acid                                                     | Amino Acid     | HMDB00641 |
| 47 | Glu       | Glutamate                           | 2-aminopentanedioic acid                                                             | Amino Acid     | HMDB00148 |
| 48 | Gly       | Glycine                             | 2-aminoacetic acid                                                                   | Amino Acid     | HMDB00123 |
| 49 | His*      | Histidine                           | 2-amino-3-(1H-imidazol-5-yl)propanoic acid                                           | Amino Acid     | HMDB00177 |
| 50 | Ile       | Isoleucine                          | (3S)-2-amino-3-methylpentanoic acid                                                  | Amino Acid     | HMDB00172 |
| 51 | Leu       | Leucine                             | 2-amino-4-methylpentanoic acid                                                       | Amino Acid     | HMDB00687 |
| 52 | Lys       | Lysine                              | 2,6-diaminohexanoic acid                                                             | Amino Acid     | HMDB00182 |
| 53 | Met       | Methionine                          | 2-amino-4-(methylsulfanyl)butanoic acid                                              | Amino Acid     | HMDB00696 |
| 54 | Orn       | Ornithine                           | 2,5-diaminopentanoic acid                                                            | Amino Acid     | HMDB00214 |
| 55 | Phe       | Phenylalanine                       | 2-amino-3-phenylpropanoic acid                                                       | Amino Acid     | HMDB00159 |
| 56 | Pro       | Proline                             | pyrrolidine-2-carboxylic acid                                                        | Amino Acid     | HMDB00162 |
| 57 | Ser       | Serine                              | 2-amino-3-hydroxypropanoic acid                                                      | Amino Acid     | HMDB00187 |
| 58 | Thr       | Threonine                           | (3R)-2-amino-3-hydroxybutanoic acid                                                  | Amino Acid     | HMDB00167 |
| 59 | Trp       | Tryptophan                          | 2-amino-3-(1H-indol-3-yl)propanoic acid                                              | Amino Acid     | HMDB00929 |
| 60 | Tyr       | Tyrosine                            | 2-amino-3-(4-hydroxyphenyl)propanoic acid                                            | Amino Acid     | HMDB00158 |
| 61 | Val       | Valine                              | 2-amino-3-methylbutanoic acid                                                        | Amino Acid     | HMDB00883 |
| 62 | Ac-Orn*   | N-Acetylornithine                   | 5-amino-2-acetamidopentanoic acid                                                    | Biogenic Amine | HMDB03357 |
| 63 | ADMA*     | Asymmetric dimethylarginine         | 2-amino-5-[(E)-[amino(dimethylamino)methylidene]amino]pentanoic acid                 | Biogenic Amine | HMDB01539 |
| 64 | SDMA*     | Symmetric dimethylarginine          | 2-amino-5-[(E)-2,3-dimethylcarbamimidamido]pentanoic acid                            | Biogenic Amine | HMDB03334 |
| 65 | total DMA | Total dimethylarginine              |                                                                                      | Biogenic Amine |           |
| 66 | alpha-AAA | Amino adipic acid                   | 2-aminohexanedioic acid                                                              | Biogenic Amine | HMDB00510 |

|    |             |                      |                                                           |                |           |
|----|-------------|----------------------|-----------------------------------------------------------|----------------|-----------|
| 67 | DOPA*       | Dopa                 | 2-amino-3-(3,4-dihydroxyphenyl)propanoic acid             | Biogenic Amine | HMDB00181 |
| 68 | Dopamine*   | Dopamine             | 4-(2-aminoethyl)benzene-1,2-diol                          | Biogenic Amine | HMDB00073 |
| 69 | Carnosine*  | Carnosine            | 2-(3-aminopropanamido)-3-(1H-imidazol-5-yl)propanoic acid | Biogenic Amine | HMDB00033 |
| 70 | Creatinine* | Creatinine           | 2-imino-1-methylimidazolidin-4-one                        | Biogenic Amine | HMDB00562 |
| 71 | Histamine*  | Histamine            | 2-(1H-imidazol-4-yl)ethan-1-amine                         | Biogenic Amine | HMDB00870 |
| 72 | Kynurenine  | Kynurenine           | 2-amino-4-(2-aminophenyl)-4-oxobutanoic acid              | Biogenic Amine | HMDB00684 |
| 73 | Met-SO      | Methionine sulfoxide | 2-amino-4-methanesulfinylbutanoic acid                    | Biogenic Amine | HMDB02005 |
| 74 | Nitro-Tyr*  | 3-Nitrotyrosine      | 2-amino-3-(4-hydroxy-3-nitrophenyl)propanoic acid         | Biogenic Amine | HMDB01904 |
| 75 | OH-Pro*     | 4-Hydroxyproline     | (4R)-4-hydroxypyrrolidine-2-carboxylic acid               | Biogenic Amine | HMDB00725 |
| 76 | PEA*        | Phenylethylamine     | 2-phenylethan-1-amine                                     | Biogenic Amine | HMDB12275 |
| 77 | Putrescine* | Putrescine           | butane-1,4-diamine                                        | Biogenic Amine | HMDB01414 |
| 78 | Sarcosine   | Sarcosine            | 2-(methylamino)acetic acid                                | Biogenic Amine | HMDB00271 |
| 79 | Serotonin   | Serotonin            | 3-(2-aminoethyl)-1H-indol-5-ol                            | Biogenic Amine | HMDB00259 |
| 80 | Spermidine  | Spermidine           | (4-aminobutyl)(3-aminopropyl)amine                        | Biogenic Amine | HMDB01257 |
| 81 | Spermine    | Spermine             | (3-aminopropyl)({4-[(3-aminopropyl)amino]butyl})amine     | Biogenic Amine | HMDB01256 |
| 82 | Taurine*    | Taurine              | 2-aminoethane-1-sulfonic acid                             | Biogenic Amine | HMDB00251 |

|     | <b>p180<br/>Abbreviation</b> | <b>Common Name</b>                    | <b>Shorthand</b> | <b>Metabolite Class</b> | <b>HMDB; LMSD ID</b>       |
|-----|------------------------------|---------------------------------------|------------------|-------------------------|----------------------------|
| 83  | lysoPC a<br>C14:0            | lysoPhosphatidylcholine acyl<br>C14:0 | LysoPC(14:0)     | Glycerophospholipid     | HMDB10379;<br>LMGP01050012 |
| 84  | lysoPC a<br>C16:0            | lysoPhosphatidylcholine acyl<br>C16:0 | LysoPC(16:0)     | Glycerophospholipid     | HMDB10382;<br>LMGP01050018 |
| 85  | lysoPC a<br>C16:1            | lysoPhosphatidylcholine acyl<br>C16:1 | LysoPC(16:1)     | Glycerophospholipid     | HMDB10383;<br>LMGP01050022 |
| 86  | lysoPC a<br>C17:0            | lysoPhosphatidylcholine acyl<br>C17:0 | LysoPC(17:0)     | Glycerophospholipid     | HMDB12108;<br>LMGP01050024 |
| 87  | lysoPC a<br>C18:0            | lysoPhosphatidylcholine acyl<br>C18:0 | LysoPC(18:0)     | Glycerophospholipid     | HMDB10384;<br>LMGP01050026 |
| 88  | lysoPC a<br>C18:1            | lysoPhosphatidylcholine acyl<br>C18:1 | LysoPC(18:1)     | Glycerophospholipid     | HMDB02815;<br>LMGP01050032 |
| 89  | lysoPC a<br>C18:2            | lysoPhosphatidylcholine acyl<br>C18:2 | LysoPC(18:2)     | Glycerophospholipid     | HMDB10386;<br>LMGP01050035 |
| 90  | lysoPC a<br>C20:3            | lysoPhosphatidylcholine acyl<br>C20:3 | LysoPC(20:3)     | Glycerophospholipid     | HMDB10394;<br>LMGP01050133 |
| 91  | lysoPC a<br>C20:4            | lysoPhosphatidylcholine acyl<br>C20:4 | LysoPC(20:4)     | Glycerophospholipid     | HMDB10396;<br>LMGP01050140 |
| 92  | lysoPC a<br>C24:0            | lysoPhosphatidylcholine acyl<br>C24:0 | LysoPC(24:0)     | Glycerophospholipid     | HMDB10405;<br>LMGP01050057 |
| 93  | lysoPC a<br>C26:0            | lysoPhosphatidylcholine acyl<br>C26:0 | LysoPC(26:0)     | Glycerophospholipid     | HMDB29205                  |
| 94  | lysoPC a<br>C26:1            | lysoPhosphatidylcholine acyl<br>C26:1 | LysoPC(26:1)     | Glycerophospholipid     | HMDB29220                  |
| 95  | lysoPC a<br>C28:0            | lysoPhosphatidylcholine acyl<br>C28:0 | LysoPC(28:0)     | Glycerophospholipid     | HMDB29206                  |
| 96  | lysoPC a<br>C28:1            | lysoPhosphatidylcholine acyl<br>C28:1 | LysoPC(28:1)     | Glycerophospholipid     | HMDB29221                  |
| 97  | PC aa C24:0                  | Phosphatidylcholine diacyl C24:0      | PC(24:0)         | Glycerophospholipid     |                            |
| 98  | PC aa C26:0                  | Phosphatidylcholine diacyl C26:0      | PC(26:0)         | Glycerophospholipid     |                            |
| 99  | PC aa C28:1                  | Phosphatidylcholine diacyl C28:1      | PC(28:1)         | Glycerophospholipid     |                            |
| 100 | PC aa C30:0                  | Phosphatidylcholine diacyl C30:0      | PC(30:0)         | Glycerophospholipid     |                            |
| 101 | PC aa C30:2                  | Phosphatidylcholine diacyl C30:2      | PC(30:2)         | Glycerophospholipid     |                            |
| 102 | PC aa C32:0                  | Phosphatidylcholine diacyl C32:0      | PC(32:0)         | Glycerophospholipid     |                            |
| 103 | PC aa C32:1                  | Phosphatidylcholine diacyl C32:1      | PC(32:1)         | Glycerophospholipid     |                            |
| 104 | PC aa C32:2                  | Phosphatidylcholine diacyl C32:2      | PC(32:2)         | Glycerophospholipid     |                            |
| 105 | PC aa C32:3                  | Phosphatidylcholine diacyl C32:3      | PC(32:3)         | Glycerophospholipid     |                            |
| 106 | PC aa C34:1                  | Phosphatidylcholine diacyl C34:1      | PC(34:1)         | Glycerophospholipid     |                            |
| 107 | PC aa C34:2                  | Phosphatidylcholine diacyl C34:2      | PC(34:2)         | Glycerophospholipid     |                            |
| 108 | PC aa C34:3                  | Phosphatidylcholine diacyl C34:3      | PC(34:3)         | Glycerophospholipid     |                            |
| 109 | PC aa C34:4                  | Phosphatidylcholine diacyl C34:4      | PC(34:4)         | Glycerophospholipid     |                            |
| 110 | PC aa C36:0                  | Phosphatidylcholine diacyl C36:0      | PC(36:0)         | Glycerophospholipid     |                            |
| 111 | PC aa C36:1                  | Phosphatidylcholine diacyl C36:1      | PC(36:1)         | Glycerophospholipid     |                            |
| 112 | PC aa C36:2                  | Phosphatidylcholine diacyl C36:2      | PC(36:2)         | Glycerophospholipid     |                            |
| 113 | PC aa C36:3                  | Phosphatidylcholine diacyl C36:3      | PC(36:3)         | Glycerophospholipid     |                            |
| 114 | PC aa C36:4                  | Phosphatidylcholine diacyl C36:4      | PC(36:4)         | Glycerophospholipid     |                            |

|     |             |                                      |                        |                     |  |
|-----|-------------|--------------------------------------|------------------------|---------------------|--|
| 115 | PC aa C36:5 | Phosphatidylcholine diacyl C36:5     | PC(36:5)               | Glycerophospholipid |  |
| 116 | PC aa C36:6 | Phosphatidylcholine diacyl C36:6     | PC(36:6)               | Glycerophospholipid |  |
| 117 | PC aa C38:0 | Phosphatidylcholine diacyl C38:0     | PC(38:0)               | Glycerophospholipid |  |
| 118 | PC aa C38:1 | Phosphatidylcholine diacyl C38:1     | PC(38:1)               | Glycerophospholipid |  |
| 119 | PC aa C38:3 | Phosphatidylcholine diacyl C38:3     | PC(38:3)               | Glycerophospholipid |  |
| 120 | PC aa C38:4 | Phosphatidylcholine diacyl C38:4     | PC(38:4)               | Glycerophospholipid |  |
| 121 | PC aa C38:5 | Phosphatidylcholine diacyl C38:5     | PC(38:5)               | Glycerophospholipid |  |
| 122 | PC aa C38:6 | Phosphatidylcholine diacyl C38:6     | PC(38:6)               | Glycerophospholipid |  |
| 123 | PC aa C40:1 | Phosphatidylcholine diacyl C40:1     | PC(40:1)               | Glycerophospholipid |  |
| 124 | PC aa C40:2 | Phosphatidylcholine diacyl C40:2     | PC(40:2)               | Glycerophospholipid |  |
| 125 | PC aa C40:3 | Phosphatidylcholine diacyl C40:3     | PC(40:3)               | Glycerophospholipid |  |
| 126 | PC aa C40:4 | Phosphatidylcholine diacyl C40:4     | PC(40:4)               | Glycerophospholipid |  |
| 127 | PC aa C40:5 | Phosphatidylcholine diacyl C40:5     | PC(40:5)               | Glycerophospholipid |  |
| 128 | PC aa C40:6 | Phosphatidylcholine diacyl C40:6     | PC(40:6)               | Glycerophospholipid |  |
| 129 | PC aa C42:0 | Phosphatidylcholine diacyl C42:0     | PC(42:0)               | Glycerophospholipid |  |
| 130 | PC aa C42:1 | Phosphatidylcholine diacyl C42:1     | PC(42:1)               | Glycerophospholipid |  |
| 131 | PC aa C42:2 | Phosphatidylcholine diacyl C42:2     | PC(42:2)               | Glycerophospholipid |  |
| 132 | PC aa C42:4 | Phosphatidylcholine diacyl C42:4     | PC(42:4)               | Glycerophospholipid |  |
| 133 | PC aa C42:5 | Phosphatidylcholine diacyl C42:5     | PC(42:5)               | Glycerophospholipid |  |
| 134 | PC aa C42:6 | Phosphatidylcholine diacyl C42:6     | PC(42:6)               | Glycerophospholipid |  |
| 135 | PC ae C30:0 | Phosphatidylcholine acyl-alkyl C30:0 | PC(O-30:0)             | Glycerophospholipid |  |
| 136 | PC ae C30:1 | Phosphatidylcholine acyl-alkyl C30:1 | PC(O-30:1); PC(P-30:0) | Glycerophospholipid |  |
| 137 | PC ae C30:2 | Phosphatidylcholine acyl-alkyl C30:2 | PC(O-30:2); PC(P-30:1) | Glycerophospholipid |  |
| 138 | PC ae C32:1 | Phosphatidylcholine acyl-alkyl C32:1 | PC(O-32:1); PC(P-32:0) | Glycerophospholipid |  |
| 139 | PC ae C32:2 | Phosphatidylcholine acyl-alkyl C32:2 | PC(O-32:2); PC(P-32:1) | Glycerophospholipid |  |
| 140 | PC ae C34:0 | Phosphatidylcholine acyl-alkyl C34:0 | PC(O-34:0)             | Glycerophospholipid |  |
| 141 | PC ae C34:1 | Phosphatidylcholine acyl-alkyl C34:1 | PC(O-34:1); PC(P-34:0) | Glycerophospholipid |  |
| 142 | PC ae C34:2 | Phosphatidylcholine acyl-alkyl C34:2 | PC(O-34:2); PC(P-34:1) | Glycerophospholipid |  |
| 143 | PC ae C34:3 | Phosphatidylcholine acyl-alkyl C34:3 | PC(O-34:3); PC(P-34:2) | Glycerophospholipid |  |
| 144 | PC ae C36:0 | Phosphatidylcholine acyl-alkyl C36:0 | PC(O-36:0)             | Glycerophospholipid |  |
| 145 | PC ae C36:1 | Phosphatidylcholine acyl-alkyl C36:1 | PC(O-36:1); PC(P-36:0) | Glycerophospholipid |  |
| 146 | PC ae C36:2 | Phosphatidylcholine acyl-alkyl C36:2 | PC(O-36:2); PC(P-36:1) | Glycerophospholipid |  |
| 147 | PC ae C36:3 | Phosphatidylcholine acyl-alkyl C36:3 | PC(O-36:3); PC(P-36:2) | Glycerophospholipid |  |
| 148 | PC ae C36:4 | Phosphatidylcholine acyl-alkyl C36:4 | PC(O-36:4); PC(P-36:3) | Glycerophospholipid |  |

|     |               |                                      |                        |                     |           |
|-----|---------------|--------------------------------------|------------------------|---------------------|-----------|
| 149 | PC ae C36:5   | Phosphatidylcholine acyl-alkyl C36:5 | PC(O-36:5); PC(P-36:4) | Glycerophospholipid |           |
| 150 | PC ae C38:0   | Phosphatidylcholine acyl-alkyl C38:0 | PC(O-38:0)             | Glycerophospholipid |           |
| 151 | PC ae C38:1   | Phosphatidylcholine acyl-alkyl C38:1 | PC(O-38:1); PC(P-38:0) | Glycerophospholipid |           |
| 152 | PC ae C38:2   | Phosphatidylcholine acyl-alkyl C38:2 | PC(O-38:2); PC(P-38:1) | Glycerophospholipid |           |
| 153 | PC ae C38:3   | Phosphatidylcholine acyl-alkyl C38:3 | PC(O-38:3); PC(P-38:2) | Glycerophospholipid |           |
| 154 | PC ae C38:4   | Phosphatidylcholine acyl-alkyl C38:4 | PC(O-38:4); PC(P-38:3) | Glycerophospholipid |           |
| 155 | PC ae C38:5   | Phosphatidylcholine acyl-alkyl C38:5 | PC(O-38:5); PC(P-38:4) | Glycerophospholipid |           |
| 156 | PC ae C38:6   | Phosphatidylcholine acyl-alkyl C38:6 | PC(O-38:6); PC(P-38:5) | Glycerophospholipid |           |
| 157 | PC ae C40:1   | Phosphatidylcholine acyl-alkyl C40:1 | PC(O-40:1); PC(P-40:0) | Glycerophospholipid |           |
| 158 | PC ae C40:2   | Phosphatidylcholine acyl-alkyl C40:2 | PC(O-40:2); PC(P-40:1) | Glycerophospholipid |           |
| 159 | PC ae C40:3   | Phosphatidylcholine acyl-alkyl C40:3 | PC(O-40:3); PC(P-40:2) | Glycerophospholipid |           |
| 160 | PC ae C40:4   | Phosphatidylcholine acyl-alkyl C40:4 | PC(O-40:4); PC(P-40:3) | Glycerophospholipid |           |
| 161 | PC ae C40:5   | Phosphatidylcholine acyl-alkyl C40:5 | PC(O-40:5); PC(P-40:4) | Glycerophospholipid |           |
| 162 | PC ae C40:6   | Phosphatidylcholine acyl-alkyl C40:6 | PC(O-40:6); PC(P-40:5) | Glycerophospholipid |           |
| 163 | PC ae C42:0   | Phosphatidylcholine acyl-alkyl C42:0 | PC(O-42:0)             | Glycerophospholipid |           |
| 164 | PC ae C42:1   | Phosphatidylcholine acyl-alkyl C42:1 | PC(O-42:1); PC(P-42:0) | Glycerophospholipid |           |
| 165 | PC ae C42:2   | Phosphatidylcholine acyl-alkyl C42:2 | PC(O-42:2); PC(P-42:1) | Glycerophospholipid |           |
| 166 | PC ae C42:3   | Phosphatidylcholine acyl-alkyl C42:3 | PC(O-42:3); PC(P-42:2) | Glycerophospholipid |           |
| 167 | PC ae C42:4*  | Phosphatidylcholine acyl-alkyl C42:4 | PC(O-42:4); PC(P-42:3) | Glycerophospholipid |           |
| 168 | PC ae C42:5   | Phosphatidylcholine acyl-alkyl C42:5 | PC(O-42:5); PC(P-42:4) | Glycerophospholipid |           |
| 169 | PC ae C44:3   | Phosphatidylcholine acyl-alkyl C44:3 | PC(O-44:3); PC(P-44:2) | Glycerophospholipid |           |
| 170 | PC ae C44:4   | Phosphatidylcholine acyl-alkyl C44:4 | PC(O-44:4); PC(P-44:3) | Glycerophospholipid |           |
| 171 | PC ae C44:5   | Phosphatidylcholine acyl-alkyl C44:5 | PC(O-44:5); PC(P-44:4) | Glycerophospholipid |           |
| 172 | PC ae C44:6   | Phosphatidylcholine acyl-alkyl C44:6 | PC(O-44:6); PC(P-44:5) | Glycerophospholipid |           |
| 173 | SM (OH) C14:1 | Hydroxysphingomyelin C14:1           | SM(d18:1/14:1(OH))     | Sphingolipid        | HMDB13462 |
| 174 | SM (OH) C16:1 | Hydroxysphingomyelin C16:1           | SM(d18:1/16:1(OH))     | Sphingolipid        | HMDB13463 |
| 175 | SM (OH) C22:1 | Hydroxysphingomyelin C22:1           | SM(d18:1/22:1(OH))     | Sphingolipid        | HMDB13466 |



|     |                  |                            |                    |              |                            |
|-----|------------------|----------------------------|--------------------|--------------|----------------------------|
| 176 | SM (OH)<br>C22:2 | Hydroxysphingomyelin C22:2 | SM(d18:1/22:2(OH)) | Sphingolipid | HMDB13467                  |
| 177 | SM (OH)<br>C24:1 | Hydroxysphingomyelin C24:1 | SM(d18:1/24:1(OH)) | Sphingolipid | HMDB13469                  |
| 178 | SM C16:0         | Sphingomyelin C16:0        | SM(d18:1/16:0)     | Sphingolipid | HMDB10169;<br>LMSP03010003 |
| 179 | SM C16:1         | Sphingomyelin C16:1        | SM(d18:1/16:1)     | Sphingolipid | HMDB13464;<br>LMSP03010041 |
| 180 | SM C18:0         | Sphingomyelin C18:0        | SM(d18:1/18:0)     | Sphingolipid | HMDB01348;<br>LMSP03010001 |
| 181 | SM C18:1         | Sphingomyelin C18:1        | SM(d18:1/18:1)     | Sphingolipid | HMDB12101;<br>LMSP03010029 |
| 182 | SM C20:2*        | Sphingomyelin C20:2        | SM(d18:1/20:2)     | Sphingolipid | HMDB13465                  |
| 183 | SM C22:3*        | Sphingomyelin C22:3        | SM(d18:1/22:3)     | Sphingolipid | HMDB13468                  |
| 184 | SM C24:0         | Sphingomyelin C24:0        | SM(d18:1/24:0)     | Sphingolipid | HMDB11697;<br>LMSP03010008 |
| 185 | SM C24:1         | Sphingomyelin C24:1        | SM(d18:1/24:1)     | Sphingolipid | HMDB12107;<br>LMSP03010007 |
| 186 | SM C26:0*        | Sphingomyelin C26:0        | SM(d18:1/26:0)     | Sphingolipid | HMDB11698;<br>LMSP03010010 |
| 187 | SM C26:1         | Sphingomyeline C26:1       | SM(d18:1/26:1)     | Sphingolipid | HMDB13461;<br>LMSP03010009 |
| 188 | H1               | Hexose                     | Total Hexoses      | Sugar        |                            |

|     | <b>p180 Abbreviation</b> | <b>Description</b>                                                               |
|-----|--------------------------|----------------------------------------------------------------------------------|
| 189 | (C2+C3) / C0             | Ratio of short chain acylcarnitines to free carnitine                            |
| 190 | AAA                      | Sum of the aromatic amino acids                                                  |
| 191 | ADMA / Arg*              | Fraction of asymmetrically dimethylated Arginine of the unmodified Arginine pool |
| 192 | BCAA                     | Sum of branched chain amino acids                                                |
| 193 | C2 / C0                  | Ratio of acetylcarnitine to free carnitine                                       |
| 194 | Cit / Arg                | Ratio of Citrulline to Arginine                                                  |
| 195 | Cit / Orn                | Ratio of Citrulline to Ornithine                                                 |
| 196 | CPT-I ratio              | Ratio of long chain acylcarnitines to free carnitine ([C16+C18]/C0)              |
| 197 | Essential AA             | Sum of essential amino acids                                                     |
| 198 | Fisher ratio             | Ratio of branched chain amino acids/aromatic amino acids                         |
| 199 | Glucogenic AA            | Sum of selected glucogenic amino acids (Alanine, Glycine, Serine)                |
| 200 | Kynurenine / Trp         | Ratio of Kynurenine to Tryptophan                                                |
| 201 | Met-SO / Met             | Fraction of sulfoxidized Methionine of unmodified Methionine pool                |
| 202 | MUFA (PC)                | Mono-unsaturated glycerophosphocholines                                          |
| 203 | MUFA (PC) / SFA (PC)     | Ratio of mono-unsaturated to saturated glycerophosphocholines                    |
| 204 | Non essential AA         | Sum of the non-essential amino acids                                             |
| 205 | Orn / Arg                | Ratio of Ornithine to Arginine                                                   |
| 206 | PUFA (PC)                | Sum of poly-unsaturated glycerophosphocholines                                   |
| 207 | PUFA (PC) / MUFA (PC)    | Ratio of poly-unsaturated to mono-unsaturated glycerophosphocholines             |

|     |                               |                                                                                          |
|-----|-------------------------------|------------------------------------------------------------------------------------------|
| 208 | PUFA (PC) / SFA (PC)          | Ratio of poly-unsaturated to saturated glycerophosphocholines                            |
| 209 | Putrescine / Orn*             | Ratio of Putrescine to Ornithine                                                         |
| 210 | SDMA / Arg*                   | Fraction of symmetrically dimethylated Arginine of the unmodified Arginine pool          |
| 211 | Serotonin / Trp               | Ratio of Serotonin to Tryptophan                                                         |
| 212 | SFA (PC)                      | Sum of saturated glycerophosphocholines                                                  |
| 213 | Spermidine / Putrescine*      | Ratio of Spermidine to Putrescine                                                        |
| 214 | Spermine / Spermidine         | Ratio of Spermine to Spermidine                                                          |
| 215 | Total (PC+SM)                 | Sum of choline containing phospholipids                                                  |
| 216 | Total AA                      | Sum of all amino acids                                                                   |
| 217 | Total AC / C0                 | Ratio of esterified to free carnitine                                                    |
| 218 | Total AC-DC / Total AC        | Fraction of dicarboxyacylcarnitines of the total acylcarnitines                          |
| 219 | Total AC-OH / Total AC        | Fraction hydroxylated acylcarnitines of the total acylcarnitines                         |
| 220 | Total DMA / Arg*              | Fraction of dimethylated Arginine of the unmodified Arginine pool                        |
| 221 | Total lysoPC                  | Sum of lysoglycerophosphocholines                                                        |
| 222 | Total lysoPC / Total PC       | Ratio of lysoglycerophosphocholines to glycerophosphocholines                            |
| 223 | Total PC                      | Sum of glycerophosphocholines                                                            |
| 224 | Total PC aa                   | Sum of diacyl-glycerophosphocholines                                                     |
| 225 | Total PC ae                   | Sum of glycerophosphocholine plasmalogens                                                |
| 226 | Total SM                      | Sum of ceramide phosphocholines (sphingomyelins)                                         |
| 227 | Total SM / Total (SM+PC)      | Fraction of ceramide phosphocholines (sphingomyelins) of total phospholipid pool         |
| 228 | Total SM / Total PC           | Ratio of total ceramide phosphocholines (sphingomyelins) to total glycerophosphocholines |
| 229 | Total SM-non OH               | Sum of non-hydroxylated ceramide phosphocholines (sphingomyelins)                        |
| 230 | Total SM-OH                   | Sum of hydroxylated ceramide phosphocholines (sphingomyelins)                            |
| 231 | Total SM-OH / Total SM-non OH | Ratio of hydroxylated to non-hydroxylated ceramide phosphocholines (sphingomyelins)      |
| 232 | Tyr / Phe                     | Ratio of Tyrosine to Phenylalanine                                                       |

**Table S2.**

|    | Metabolite     | <i>P value</i> * | 0 w and 2 w |       |           |   | 6 w and Sham |       |       |   |
|----|----------------|------------------|-------------|-------|-----------|---|--------------|-------|-------|---|
|    |                |                  | Mean        | SD    | SE<br>M   | N | Mean         | SD    | SEM   | N |
| 1  | C0             | 8.25E-05         | 39.33       | 16.4  | 6.7       | 6 | 255.96       | 92.2  | 30.7  | 9 |
| 2  | C2             | 5.72E-04         | 18.37       | 4.0   | 1.6       | 6 | 60.17        | 22.1  | 7.4   | 9 |
| 3  | C3             | 0.0106           | 1.00        | 0.5   | 0.2       | 6 | 2.12         | 0.8   | 0.3   | 9 |
| 4  | Asp            | 0.0022           | 273.40      | 130.3 | 53.2      | 6 | 557.47       | 148.9 | 49.6  | 9 |
| 5  | Glu            | 0.0134           | 737.20      | 191.0 | 78.0      | 6 | 1056.67      | 224.0 | 74.7  | 9 |
| 6  | Gly            | 8.95E-05         | 490.50      | 119.9 | 49.0      | 6 | 1625.33      | 482.8 | 160.9 | 9 |
| 7  | Lys            | 0.0269           | 138.50      | 23.6  | 9.6       | 6 | 92.46        | 40.6  | 13.5  | 9 |
| 8  | Met-SO         | 2.95E-04         | 0.41        | 0.3   | 0.1       | 6 | 2.77         | 1.1   | 0.4   | 9 |
| 9  | lysoPC a C18:1 | 0.0207           | 8.69        | 3.2   | 1.3       | 6 | 13.01        | 3.1   | 1.0   | 9 |
| 10 | lysoPC a C20:3 | 0.0068           | 1.07        | 0.2   | 0.1       | 6 | 2.31         | 0.9   | 0.3   | 9 |
| 11 | lysoPC a C20:4 | 0.0041           | 5.37        | 2.3   | 1.0       | 6 | 9.70         | 2.4   | 0.8   | 9 |
| 12 | lysoPC a C24:0 | 0.0028           | 0.62        | 0.2   | 0.1       | 6 | 1.57         | 0.6   | 0.2   | 9 |
| 13 | lysoPC a C26:0 | 0.0103           | 0.60        | 0.1   | 0.0       | 6 | 0.95         | 0.3   | 0.1   | 9 |
| 14 | lysoPC a C28:0 | 1.80E-05         | 0.60        | 0.1   | 0.0       | 6 | 1.12         | 0.2   | 0.1   | 9 |
| 15 | lysoPC a C28:1 | 0.0115           | 0.43        | 0.1   | 0.0       | 6 | 0.61         | 0.1   | 0.0   | 9 |
| 16 | PC aa C28:1    | 0.0107           | 0.70        | 0.4   | 0.2       | 6 | 1.14         | 0.2   | 0.1   | 9 |
| 17 | PC aa C30:0    | 1.93E-04         | 64.14       | 48.0  | 19.6      | 6 | 394.53       | 151.1 | 50.4  | 9 |
| 18 | PC aa C30:2    | 0.0123           | 0.69        | 0.5   | 0.2       | 6 | 1.43         | 0.5   | 0.2   | 9 |
| 19 | PC aa C32:0    | 2.05E-07         | 424.34      | 346.6 | 141.<br>5 | 6 | 1795.36      | 193.4 | 64.5  | 9 |
| 20 | PC aa C32:1    | 7.84E-04         | 498.18      | 383.1 | 156.<br>4 | 6 | 1214.67      | 258.5 | 86.2  | 9 |
| 21 | PC aa C32:2    | 0.0220           | 42.84       | 32.1  | 13.1      | 6 | 84.56        | 29.3  | 9.8   | 9 |
| 22 | PC aa C34:1    | 1.37E-05         | 204.13      | 173.8 | 71.0      | 6 | 689.95       | 107.0 | 35.7  | 9 |
| 23 | PC aa C34:2    | 0.0010           | 273.38      | 209.3 | 85.4      | 6 | 614.03       | 103.7 | 34.6  | 9 |
| 24 | PC aa C34:3    | 0.0026           | 24.60       | 18.0  | 7.3       | 6 | 54.68        | 13.5  | 4.5   | 9 |
| 25 | PC aa C34:4    | 0.0043           | 3.07        | 2.1   | 0.9       | 6 | 8.09         | 3.1   | 1.0   | 9 |
| 26 | PC aa C36:0    | 1.25E-05         | 3.69        | 2.7   | 1.1       | 6 | 12.19        | 2.2   | 0.7   | 9 |
| 27 | PC aa C36:1    | 3.87E-06         | 15.11       | 12.7  | 5.2       | 6 | 121.98       | 32.5  | 10.8  | 9 |
| 28 | PC aa C36:2    | 5.46E-04         | 90.60       | 78.0  | 31.8      | 6 | 224.70       | 35.8  | 11.9  | 9 |
| 29 | PC aa C36:3    | 1.92E-04         | 49.97       | 39.3  | 16.0      | 6 | 127.97       | 19.6  | 6.5   | 9 |
| 30 | PC aa C36:4    | 0.0021           | 187.70      | 141.6 | 57.8      | 6 | 469.12       | 137.8 | 45.9  | 9 |
| 31 | PC aa C36:5    | 0.0233           | 12.12       | 8.3   | 3.4       | 6 | 23.13        | 8.0   | 2.7   | 9 |
| 32 | PC aa C36:6    | 0.0224           | 1.18        | 0.8   | 0.3       | 6 | 2.25         | 0.8   | 0.3   | 9 |
| 33 | PC aa C38:0    | 0.0028           | 2.32        | 1.7   | 0.7       | 6 | 5.03         | 1.2   | 0.4   | 9 |
| 34 | PC aa C38:1    | 1.96E-05         | 0.91        | 0.6   | 0.2       | 6 | 6.54         | 2.0   | 0.7   | 9 |
| 35 | PC aa C38:3    | 4.34E-07         | 13.33       | 11.3  | 4.6       | 6 | 66.08        | 10.5  | 3.5   | 9 |
| 36 | PC aa C38:4    | 1.05E-04         | 75.79       | 57.4  | 23.4      | 6 | 249.37       | 61.6  | 20.5  | 9 |

|    |             |          |       |      |      |   |       |      |     |   |
|----|-------------|----------|-------|------|------|---|-------|------|-----|---|
| 37 | PC aa C38:5 | 0.0054   | 38.63 | 30.0 | 12.2 | 6 | 88.55 | 27.4 | 9.1 | 9 |
| 38 | PC aa C40:1 | 1.69E-05 | 1.08  | 0.1  | 0.1  | 6 | 3.54  | 0.9  | 0.3 | 9 |
| 39 | PC aa C40:2 | 6.37E-06 | 0.55  | 0.3  | 0.1  | 6 | 3.65  | 1.0  | 0.3 | 9 |
| 40 | PC aa C40:3 | 1.38E-07 | 0.44  | 0.3  | 0.1  | 6 | 3.65  | 0.7  | 0.2 | 9 |
| 41 | PC aa C40:4 | 2.85E-06 | 3.12  | 2.4  | 1.0  | 6 | 20.30 | 5.0  | 1.7 | 9 |
| 42 | PC aa C40:5 | 7.27E-05 | 6.00  | 4.7  | 1.9  | 6 | 20.81 | 5.1  | 1.7 | 9 |
| 43 | PC aa C42:0 | 5.28E-05 | 0.31  | 0.1  | 0.1  | 6 | 0.62  | 0.1  | 0.0 | 9 |
| 44 | PC aa C42:1 | 2.12E-04 | 0.16  | 0.1  | 0.0  | 6 | 1.28  | 0.5  | 0.2 | 9 |
| 45 | PC aa C42:2 | 1.29E-04 | 0.25  | 0.1  | 0.0  | 6 | 2.14  | 0.8  | 0.3 | 9 |
| 46 | PC aa C42:4 | 5.29E-07 | 0.29  | 0.2  | 0.1  | 6 | 2.52  | 0.6  | 0.2 | 9 |
| 47 | PC aa C42:5 | 1.47E-06 | 0.55  | 0.4  | 0.2  | 6 | 3.21  | 0.7  | 0.2 | 9 |
| 48 | PC aa C42:6 | 2.75E-05 | 1.16  | 0.4  | 0.2  | 6 | 3.01  | 0.6  | 0.2 | 9 |
| 49 | PC ae C30:0 | 8.29E-05 | 1.25  | 0.7  | 0.3  | 6 | 6.49  | 2.2  | 0.7 | 9 |
| 50 | PC ae C30:1 | 7.61E-06 | 0.58  | 0.3  | 0.1  | 6 | 2.74  | 0.7  | 0.2 | 9 |
| 51 | PC ae C30:2 | 2.29E-05 | 0.13  | 0.1  | 0.0  | 6 | 0.30  | 0.0  | 0.0 | 9 |
| 52 | PC ae C32:1 | 1.11E-06 | 12.18 | 9.9  | 4.0  | 6 | 97.19 | 22.8 | 7.6 | 9 |
| 53 | PC ae C32:2 | 3.14E-06 | 2.34  | 1.9  | 0.8  | 6 | 9.11  | 1.5  | 0.5 | 9 |
| 54 | PC ae C34:0 | 3.65E-05 | 4.36  | 3.5  | 1.4  | 6 | 28.02 | 8.9  | 3.0 | 9 |
| 55 | PC ae C34:1 | 2.12E-05 | 18.07 | 15.2 | 6.2  | 6 | 61.38 | 10.9 | 3.6 | 9 |
| 56 | PC ae C34:2 | 6.67E-06 | 6.77  | 5.4  | 2.2  | 6 | 28.31 | 5.8  | 1.9 | 9 |
| 57 | PC ae C34:3 | 7.87E-06 | 1.90  | 1.5  | 0.6  | 6 | 6.92  | 1.2  | 0.4 | 9 |
| 58 | PC ae C36:0 | 5.47E-06 | 0.80  | 0.4  | 0.2  | 6 | 3.98  | 1.0  | 0.3 | 9 |
| 59 | PC ae C36:1 | 1.73E-06 | 2.81  | 2.0  | 0.8  | 6 | 12.73 | 2.5  | 0.8 | 9 |
| 60 | PC ae C36:2 | 3.76E-05 | 4.96  | 3.7  | 1.5  | 6 | 14.02 | 2.1  | 0.7 | 9 |
| 61 | PC ae C36:3 | 7.26E-05 | 2.70  | 2.1  | 0.9  | 6 | 7.91  | 1.5  | 0.5 | 9 |
| 62 | PC ae C36:4 | 2.56E-05 | 10.40 | 8.4  | 3.4  | 6 | 40.19 | 9.2  | 3.1 | 9 |
| 63 | PC ae C36:5 | 6.14E-07 | 8.50  | 6.6  | 2.7  | 6 | 40.46 | 6.8  | 2.3 | 9 |
| 64 | PC ae C38:1 | 1.35E-04 | 0.71  | 0.3  | 0.1  | 6 | 2.90  | 1.0  | 0.3 | 9 |
| 65 | PC ae C38:2 | 1.32E-05 | 1.38  | 1.0  | 0.4  | 6 | 4.96  | 1.0  | 0.3 | 9 |
| 66 | PC ae C38:3 | 2.57E-06 | 1.45  | 0.9  | 0.4  | 6 | 4.42  | 0.6  | 0.2 | 9 |
| 67 | PC ae C38:4 | 4.42E-05 | 5.47  | 4.0  | 1.6  | 6 | 18.94 | 4.4  | 1.5 | 9 |
| 68 | PC ae C38:5 | 0.0020   | 10.51 | 8.5  | 3.5  | 6 | 29.26 | 9.7  | 3.2 | 9 |
| 69 | PC ae C38:6 | 1.34E-04 | 5.41  | 4.2  | 1.7  | 6 | 15.18 | 2.9  | 1.0 | 9 |
| 70 | PC ae C40:1 | 0.0277   | 4.01  | 2.8  | 1.1  | 6 | 6.93  | 1.8  | 0.6 | 9 |
| 71 | PC ae C40:2 | 2.08E-06 | 0.44  | 0.2  | 0.1  | 6 | 1.81  | 0.4  | 0.1 | 9 |
| 72 | PC ae C40:3 | 2.88E-07 | 0.43  | 0.2  | 0.1  | 6 | 1.93  | 0.3  | 0.1 | 9 |
| 73 | PC ae C40:4 | 8.53E-07 | 1.47  | 0.9  | 0.4  | 6 | 6.71  | 1.2  | 0.4 | 9 |
| 74 | PC ae C40:5 | 2.93E-04 | 1.77  | 1.3  | 0.5  | 6 | 5.60  | 1.6  | 0.5 | 9 |
| 75 | PC ae C40:6 | 0.0115   | 2.36  | 1.7  | 0.7  | 6 | 4.75  | 1.4  | 0.5 | 9 |
| 76 | PC ae C42:0 | 4.64E-04 | 3.32  | 0.5  | 0.2  | 6 | 4.41  | 0.4  | 0.1 | 9 |
| 77 | PC ae C42:1 | 7.47E-04 | 1.09  | 0.6  | 0.2  | 6 | 2.68  | 0.8  | 0.3 | 9 |

|     |                        |          |         |        |       |   |         |        |       |   |
|-----|------------------------|----------|---------|--------|-------|---|---------|--------|-------|---|
| 78  | PC ae C42:2            | 2.77E-04 | 0.65    | 0.4    | 0.2   | 6 | 1.53    | 0.3    | 0.1   | 9 |
| 79  | PC ae C42:5            | 1.36E-05 | 1.73    | 0.3    | 0.1   | 6 | 3.27    | 0.5    | 0.2   | 9 |
| 80  | PC ae C44:3            | 9.39E-04 | 0.28    | 0.1    | 0.1   | 6 | 0.53    | 0.1    | 0.0   | 9 |
| 81  | PC ae C44:4            | 1.21E-05 | 0.36    | 0.1    | 0.0   | 6 | 0.63    | 0.1    | 0.0   | 9 |
| 82  | PC ae C44:6            | 6.10E-06 | 0.27    | 0.1    | 0.0   | 6 | 0.62    | 0.1    | 0.0   | 9 |
| 83  | SM (OH) C14:1          | 4.42E-04 | 1.98    | 1.5    | 0.6   | 6 | 4.49    | 0.6    | 0.2   | 9 |
| 84  | SM (OH) C16:1          | 2.60E-07 | 0.80    | 0.6    | 0.2   | 6 | 2.98    | 0.3    | 0.1   | 9 |
| 85  | SM (OH) C22:1          | 3.38E-05 | 0.78    | 0.7    | 0.3   | 6 | 11.34   | 4.1    | 1.4   | 9 |
| 86  | SM (OH) C22:2          | 2.85E-06 | 0.79    | 0.7    | 0.3   | 6 | 6.78    | 1.8    | 0.6   | 9 |
| 87  | SM (OH) C24:1          | 6.31E-06 | 0.23    | 0.2    | 0.1   | 6 | 1.51    | 0.4    | 0.1   | 9 |
| 88  | SM C16:0               | 3.85E-06 | 70.46   | 55.5   | 22.7  | 6 | 276.08  | 48.4   | 16.1  | 9 |
| 89  | SM C18:0               | 4.89E-06 | 3.07    | 2.8    | 1.1   | 6 | 33.00   | 9.5    | 3.2   | 9 |
| 90  | SM C18:1               | 6.03E-04 | 1.70    | 1.5    | 0.6   | 6 | 4.55    | 1.0    | 0.3   | 9 |
| 91  | SM C24:0               | 1.17E-06 | 3.10    | 2.5    | 1.0   | 6 | 44.20   | 11.6   | 3.9   | 9 |
| 92  | SM C24:1               | 5.62E-07 | 13.15   | 13.1   | 5.3   | 6 | 138.25  | 31.8   | 10.6  | 9 |
| 93  | SM C26:1               | 8.60E-06 | 0.07    | 0.1    | 0.0   | 6 | 0.86    | 0.3    | 0.1   | 9 |
| 94  | (C2+C3) / C0           | 0.0279   | 0.58    | 0.3    | 0.1   | 6 | 0.28    | 0.1    | 0.0   | 9 |
| 95  | CPT-I ratio            | 0.0032   | 0.11    | 0.1    | 0.0   | 6 | 0.02    | 0.0    | 0.0   | 9 |
| 96  | Glucogenic AA          | 7.89E-05 | 1132.40 | 293.3  | 119.7 | 6 | 2514.93 | 544.2  | 181.4 | 9 |
| 97  | Met-SO / Met           | 0.0013   | 0.01    | 0.0    | 0.0   | 6 | 0.06    | 0.0    | 0.0   | 9 |
| 98  | MUFA (PC)              | 4.98E-05 | 758.82  | 598.7  | 244.4 | 6 | 2219.12 | 361.4  | 120.5 | 9 |
| 99  | MUFA (PC) / SFA (PC)   | 1.55E-04 | 1.39    | 0.2    | 0.1   | 6 | 0.99    | 0.1    | 0.0   | 9 |
| 100 | Non essential AA       | 8.20E-04 | 3503.15 | 752.1  | 307.0 | 6 | 5457.45 | 916.3  | 305.4 | 9 |
| 101 | PUFA (PC)              | 5.48E-04 | 1018.49 | 763.4  | 311.7 | 6 | 2504.19 | 510.2  | 170.1 | 9 |
| 102 | PUFA (PC) / MUFA (PC)  | 0.0013   | 1.41    | 0.1    | 0.1   | 6 | 1.13    | 0.1    | 0.0   | 9 |
| 103 | PUFA (PC) / SFA (PC)   | 5.94E-06 | 1.94    | 0.3    | 0.1   | 6 | 1.11    | 0.2    | 0.1   | 9 |
| 104 | SFA (PC)               | 3.26E-07 | 513.26  | 401.9  | 164.1 | 6 | 2260.84 | 311.5  | 103.8 | 9 |
| 105 | Total (PC+SM)          | 1.40E-05 | 2397.51 | 1839.6 | 751.0 | 6 | 7522.80 | 1129.7 | 376.6 | 9 |
| 106 | Total AA               | 0.0022   | 4247.32 | 806.6  | 329.3 | 6 | 6131.29 | 1012.8 | 337.6 | 9 |
| 107 | Total AC / C0          | 0.0114   | 1.55    | 1.1    | 0.5   | 6 | 0.44    | 0.3    | 0.1   | 9 |
| 108 | Total AC-DC / Total AC | 0.0022   | 0.13    | 0.0    | 0.0   | 6 | 0.07    | 0.0    | 0.0   | 9 |
| 109 | Total AC-OH / Total AC | 4.29E-04 | 0.08    | 0.0    | 0.0   | 6 | 0.05    | 0.0    | 0.0   | 9 |
| 110 | Total PC               | 2.23E-05 | 2290.56 | 1755.8 | 716.8 | 6 | 6984.15 | 1090.1 | 363.4 | 9 |
| 111 | Total PC aa            | 2.86E-05 | 2162.99 | 1664.8 | 679.7 | 6 | 6497.52 | 1029.2 | 343.1 | 9 |

|     |                          |          |        |      |      |   |        |      |      |   |
|-----|--------------------------|----------|--------|------|------|---|--------|------|------|---|
| 112 | Total PC ae              | 2.17E-06 | 127.58 | 92.2 | 37.6 | 6 | 486.63 | 80.0 | 26.7 | 9 |
| 113 | Total SM                 | 5.88E-07 | 106.95 | 85.3 | 34.8 | 6 | 538.65 | 94.1 | 31.4 | 9 |
| 114 | Total SM / Total (SM+PC) | 1.88E-04 | 0.05   | 0.0  | 0.0  | 6 | 0.07   | 0.0  | 0.0  | 9 |
| 115 | Total SM / Total PC      | 2.00E-04 | 0.05   | 0.0  | 0.0  | 6 | 0.08   | 0.0  | 0.0  | 9 |
| 116 | Total SM-non OH          | 6.99E-07 | 102.37 | 82.0 | 33.5 | 6 | 511.55 | 90.6 | 30.2 | 9 |
| 117 | Total SM-OH              | 3.42E-06 | 4.58   | 3.4  | 1.4  | 6 | 27.10  | 6.6  | 2.2  | 9 |

\* all p-values were < 0.05 and had a FDR < 5.0%

**Table S3.**

|    | Metabolite      | <i>P</i><br><i>value</i> | 6 w         |        |            |   | Sham    |       |       |   |
|----|-----------------|--------------------------|-------------|--------|------------|---|---------|-------|-------|---|
|    |                 |                          | Mean        | SD     | SEM        | N | Mean    | SD    | SEM   | N |
| 1  | Asn*            | 0.0025                   | 135.48      | 32.06  | 14.34      | 5 | 56.87   | 12.09 | 6.05  | 4 |
| 2  | Cit*            | 0.0067                   | 19.97       | 8.78   | 3.93       | 5 | 2.53    | 2.48  | 1.24  | 4 |
| 3  | Lys*            | 0.0153                   | 118.80      | 35.35  | 15.81      | 5 | 59.54   | 11.08 | 5.54  | 4 |
| 4  | Pro             | 0.0220                   | 149.64      | 34.15  | 15.27      | 5 | 91.28   | 22.36 | 11.18 | 4 |
| 5  | Ser*            | 0.0137                   | 337.56      | 99.19  | 44.36      | 5 | 161.55  | 44.03 | 22.01 | 4 |
| 6  | Thr*            | 0.0136                   | 224.52      | 53.68  | 24.01      | 5 | 129.60  | 22.65 | 11.32 | 4 |
| 7  | Trp             | 0.0374                   | 26.62       | 7.94   | 3.55       | 5 | 15.18   | 4.38  | 2.19  | 4 |
| 8  | Tyr*            | 0.0067                   | 82.20       | 16.85  | 7.54       | 5 | 46.34   | 9.06  | 4.53  | 4 |
| 9  | Val             | 0.0412                   | 105.60      | 26.93  | 12.04      | 5 | 63.87   | 21.96 | 10.98 | 4 |
| 10 | Met-SO          | 0.0184                   | 2.05        | 0.75   | 0.33       | 5 | 3.68    | 0.86  | 0.43  | 4 |
| 11 | lysoPC a C14:0  | 0.0186                   | 12.57       | 2.15   | 0.96       | 5 | 9.23    | 0.16  | 0.08  | 4 |
| 12 | lysoPC a C24:0  | 0.0380                   | 1.92        | 0.59   | 0.26       | 5 | 1.14    | 0.15  | 0.07  | 4 |
| 13 | lysoPC a C26:0  | 0.0253                   | 1.12        | 0.22   | 0.10       | 5 | 0.74    | 0.17  | 0.08  | 4 |
| 14 | lysoPC a C26:1* | 0.0005                   | 1.02        | 0.17   | 0.08       | 5 | 0.47    | 0.05  | 0.03  | 4 |
| 15 | lysoPC a C28:0  | 0.0293                   | 1.23        | 0.12   | 0.05       | 5 | 0.98    | 0.16  | 0.08  | 4 |
| 16 | PC aa C30:0*    | 0.0024                   | 505.19      | 104.70 | 46.82      | 5 | 256.20  | 17.46 | 8.73  | 4 |
| 17 | PC aa C30:2*    | 0.0016                   | 1.78        | 0.29   | 0.13       | 5 | 1.00    | 0.10  | 0.05  | 4 |
| 18 | PC aa C32:1     | 0.0187                   | 1379.2<br>2 | 228.70 | 102.2<br>8 | 5 | 1008.99 | 83.31 | 41.66 | 4 |
| 19 | PC aa C32:2*    | 0.0064                   | 104.91      | 23.27  | 10.41      | 5 | 59.11   | 4.21  | 2.11  | 4 |
| 20 | PC aa C32:3*    | 0.0026                   | 29.06       | 8.34   | 3.73       | 5 | 9.68    | 0.39  | 0.20  | 4 |
| 21 | PC aa C34:3     | 0.0191                   | 63.23       | 12.33  | 5.51       | 5 | 43.98   | 2.53  | 1.26  | 4 |
| 22 | PC aa C34:4*    | 0.0056                   | 10.26       | 2.42   | 1.08       | 5 | 5.38    | 0.41  | 0.20  | 4 |
| 23 | PC aa C36:1*    | 0.0123                   | 100.51      | 25.57  | 11.44      | 5 | 148.83  | 14.50 | 7.25  | 4 |
| 24 | PC aa C36:4     | 0.0210                   | 555.76      | 126.02 | 56.36      | 5 | 360.81  | 35.84 | 17.92 | 4 |
| 25 | PC aa C36:5*    | 0.0122                   | 28.41       | 6.83   | 3.05       | 5 | 16.52   | 1.73  | 0.86  | 4 |
| 26 | PC aa C36:6*    | 0.0113                   | 2.76        | 0.64   | 0.29       | 5 | 1.61    | 0.20  | 0.10  | 4 |
| 27 | PC aa C38:1     | 0.0379                   | 5.35        | 2.01   | 0.90       | 5 | 8.04    | 0.61  | 0.30  | 4 |
| 28 | PC aa C38:5     | 0.0432                   | 104.32      | 27.58  | 12.33      | 5 | 68.83   | 7.84  | 3.92  | 4 |
| 29 | PC aa C40:2     | 0.0449                   | 3.08        | 0.95   | 0.42       | 5 | 4.37    | 0.51  | 0.26  | 4 |
| 30 | PC aa C42:1*    | 0.0016                   | 0.89        | 0.31   | 0.14       | 5 | 1.78    | 0.19  | 0.10  | 4 |
| 31 | PC aa C42:2*    | 0.0073                   | 1.56        | 0.66   | 0.30       | 5 | 2.87    | 0.24  | 0.12  | 4 |
| 32 | PC ae C30:0*    | 0.0036                   | 8.06        | 1.60   | 0.71       | 5 | 4.52    | 0.35  | 0.17  | 4 |
| 33 | PC ae C30:1     | 0.0365                   | 3.15        | 0.68   | 0.30       | 5 | 2.24    | 0.17  | 0.09  | 4 |
| 34 | PC ae C34:0     | 0.0441                   | 33.13       | 9.02   | 4.03       | 5 | 21.63   | 2.40  | 1.20  | 4 |
| 35 | PC ae C34:2     | 0.0330                   | 24.85       | 5.07   | 2.27       | 5 | 32.64   | 3.25  | 1.63  | 4 |
| 36 | PC ae C34:3     | 0.0373                   | 6.20        | 1.18   | 0.53       | 5 | 7.83    | 0.48  | 0.24  | 4 |
| 37 | PC ae C38:1     | 0.0207                   | 2.29        | 0.74   | 0.33       | 5 | 3.66    | 0.61  | 0.30  | 4 |

|    |                                   |        |             |             |            |   |         |        |            |   |
|----|-----------------------------------|--------|-------------|-------------|------------|---|---------|--------|------------|---|
| 38 | PC ae C38:2                       | 0.0338 | 4.36        | 0.69        | 0.31       | 5 | 5.71    | 0.85   | 0.42       | 4 |
| 39 | PC ae C42:5                       | 0.0286 | 3.58        | 0.42        | 0.19       | 5 | 2.89    | 0.29   | 0.15       | 4 |
| 40 | SM (OH) C22:1*                    | 0.0100 | 8.58        | 3.17        | 1.42       | 5 | 14.80   | 1.71   | 0.85       | 4 |
| 41 | SM (OH) C22:2                     | 0.0178 | 5.65        | 1.36        | 0.61       | 5 | 8.18    | 1.01   | 0.50       | 4 |
| 42 | SM C18:0*                         | 0.0038 | 26.22       | 6.92        | 3.09       | 5 | 41.47   | 1.82   | 0.91       | 4 |
| 43 | SM C18:1                          | 0.0162 | 3.92        | 0.84        | 0.37       | 5 | 5.33    | 0.32   | 0.16       | 4 |
| 44 | H1*                               | 0.0123 | 1887.5<br>2 | 424.38      | 189.7<br>9 | 5 | 995.25  | 359.02 | 179.5<br>1 | 4 |
| 45 | AAA                               | 0.0403 | 191.50      | 58.25       | 26.05      | 5 | 113.24  | 22.59  | 11.29      | 4 |
| 46 | Cit / Arg*                        | 0.0092 | 0.47        | 0.21        | 0.09       | 5 | 0.08    | 0.06   | 0.03       | 4 |
| 47 | Essential AA                      | 0.0267 | 822.34      | 214.72      | 96.02      | 5 | 488.24  | 112.37 | 56.18      | 4 |
| 48 | Met-SO / Met*                     | 0.0076 | 0.04        | 0.02        | 0.01       | 5 | 0.09    | 0.02   | 0.01       | 4 |
| 49 | SFA (PC)*                         | 0.0041 | 2482.8<br>6 | 127.14      | 56.86      | 5 | 1983.32 | 228.98 | 114.4<br>9 | 4 |
| 50 | Total PC                          | 0.0406 | 7616.4<br>2 | 1036.8<br>6 | 463.7<br>0 | 5 | 6193.82 | 486.44 | 243.2<br>2 | 4 |
| 51 | Total PC aa                       | 0.0329 | 7111.9<br>2 | 947.82      | 423.8<br>8 | 5 | 5729.51 | 459.77 | 229.8<br>8 | 4 |
| 52 | Total SM / Total (SM+PC)          | 0.0401 | 0.07        | 0.01        | 0.01       | 5 | 0.08    | 0.00   | 0.00       | 4 |
| 53 | Total SM / Total PC               | 0.0382 | 0.07        | 0.01        | 0.01       | 5 | 0.09    | 0.00   | 0.00       | 4 |
| 54 | Total SM-OH                       | 0.0195 | 22.94       | 5.06        | 2.26       | 5 | 32.30   | 3.97   | 1.99       | 4 |
| 55 | Total SM-OH / Total SM-non<br>OH* | 0.0015 | 0.05        | 0.01        | 0.00       | 5 | 0.06    | 0.00   | 0.00       | 4 |

\* FDR < 5.0%



Figure S1.

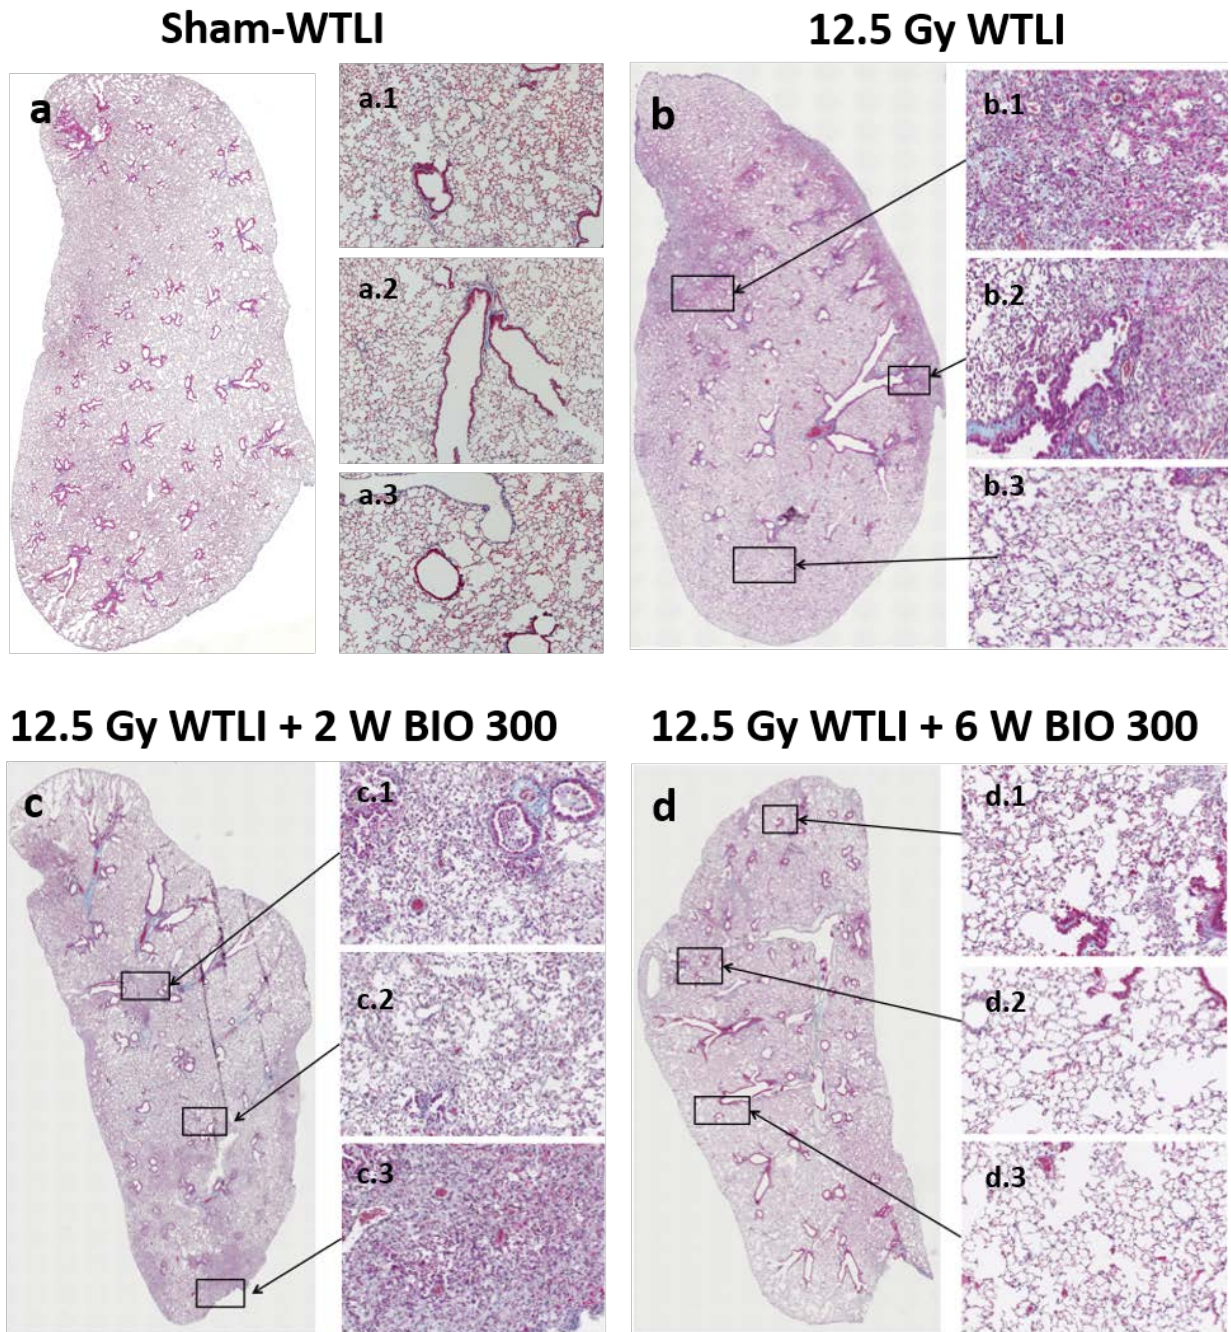

**Figure S2.**

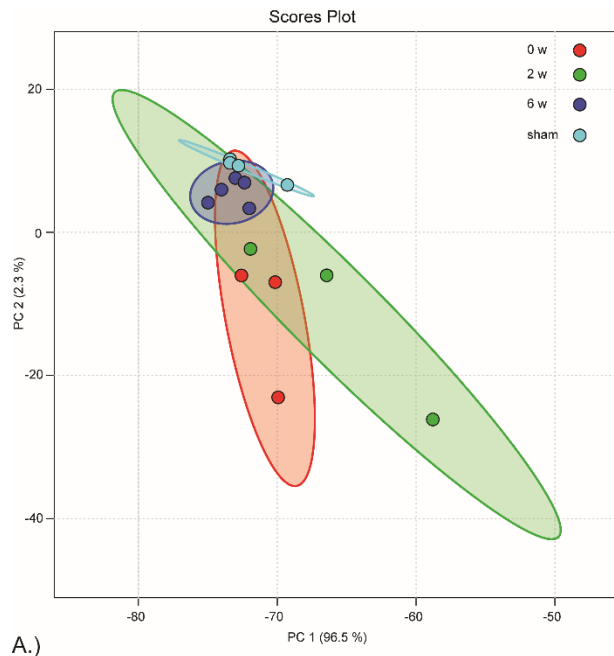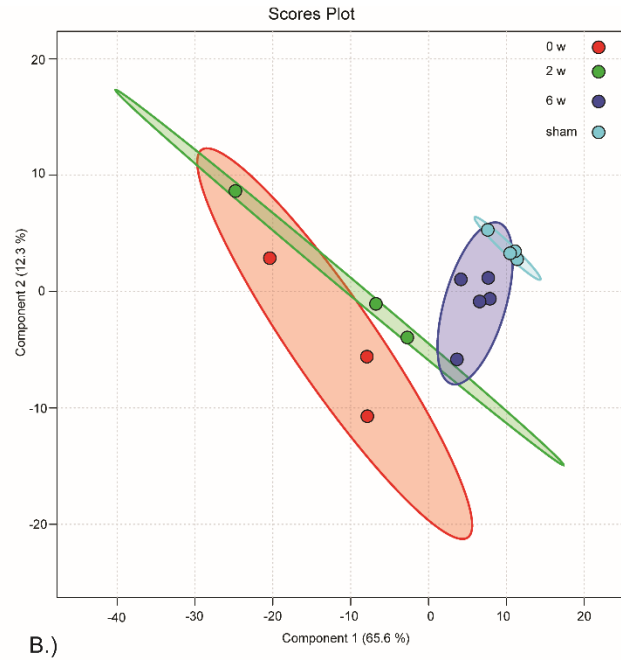

**Figure S3.**

- 0 w ●
- 2 w ●
- 6 w ●
- sham ●

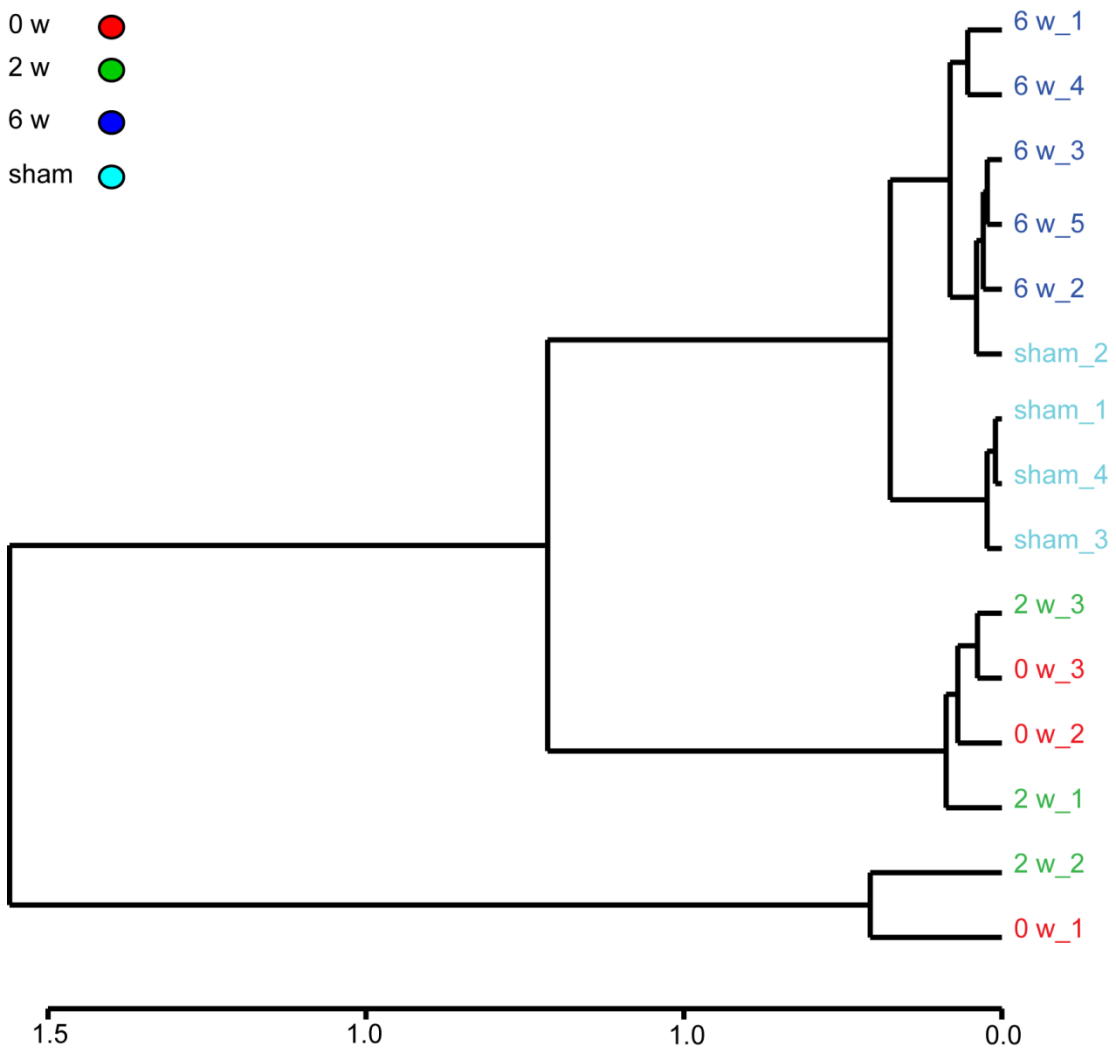

Supplement: NIHMS1592471-supplement-Supplemental_28971289.pdf [file NIHMS1592471-supplement-Supplemental_28971289.pdf]
